# Supplementary material
Source: publisher figshare collection journal article supplement (https://karger.figshare.com/ndownloader/files/35057002)

**Fig. S3.** Schematic representation of the domain structure of the pyrin protein

The pyrin protein comprises five domains, including the pyrin, bZIP transcription factor, B-box, coiled coil, and B30.2/SPRY domains. The variants genotyped in this study are shown as grey bars.

**Fig. S3**


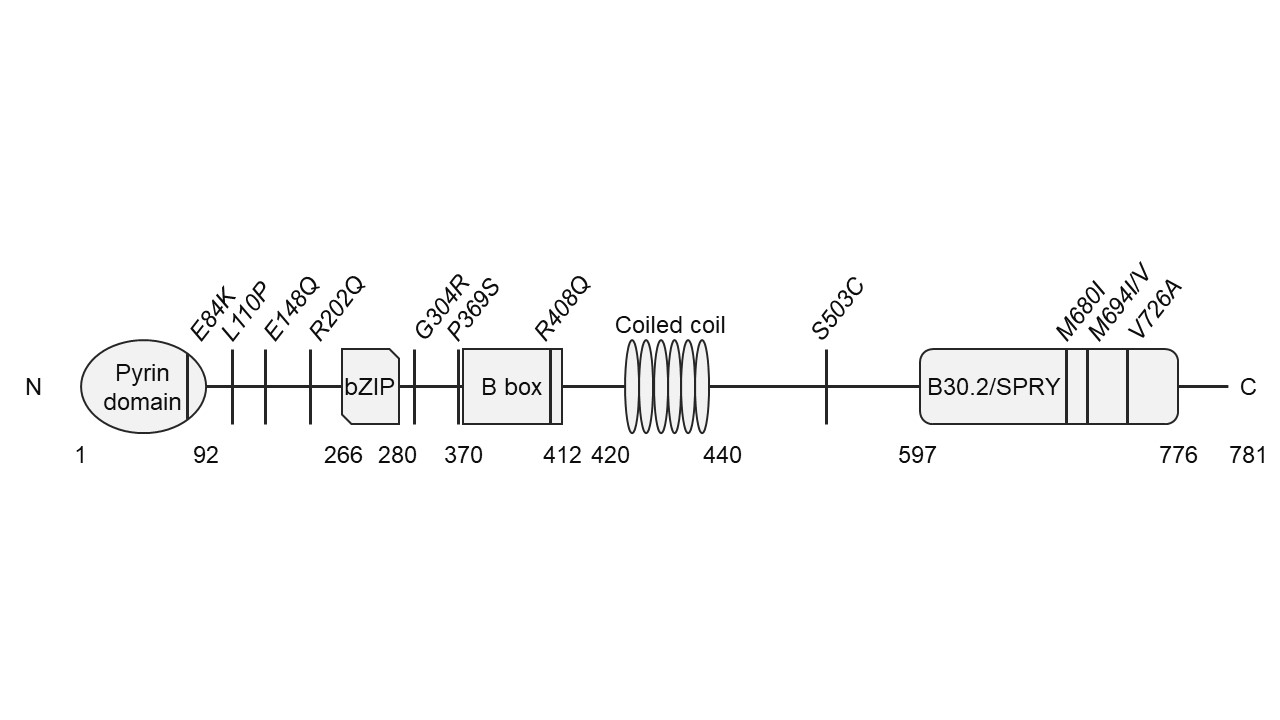

Supplement: Supplementary file 1 [file 35057002]
